# Supplementary material for: Solidification/Stabilization of MSWI Fly Ash Using a Novel Metallurgical Slag-Based Cementitious Material
Source: MDPI journal article supplement (doi:10.3390/min12050599), 2022-05-10
Supplement: s1 [file s1]

## Article

# Solidification/Stabilization of MSWI Fly Ash Using a Novel Metallurgical Slag-Based Cementitious Material

Wei Deng <sup>1</sup>, Pingfeng Fu <sup>1,\*</sup>, Guiwen Fang <sup>1</sup>, Wan Zhu <sup>1</sup>, Shan Li <sup>2</sup>, Xiaofei Wang <sup>3,4</sup>, Tianli Xue <sup>4</sup> and Yuqi Chen <sup>1</sup>

<sup>1</sup> School of Civil and Resources Engineering, University of Science and Technology Beijing, Beijing 100083, China; 18821968838@139.com (W.D.); 18175316653@163.com (G.F.); 41927225@xs.ustb.edu.cn (W.Z.); 13130172031@163.com (Y.C.)

<sup>2</sup> Institute of Resources and Environment, Beijing Academy of Science and Technology, Beijing 100089, China; ls\_903@163.com

<sup>3</sup> School of Environmental Science and Technology, Hubei Polytechnic University, Huangshi 435003, China; wangxiaofei26@163.com

<sup>4</sup> Green Environmental Technology Company Ltd., Nanning 530031, China; xtl041@163.com

\* Correspondence: pffu@ces.ustb.edu.cn

**Table S1.** The comprehensive strength of pure MSCM pastes with different proportions of raw materials.

| MSCM<br>Pastes | Proportion of Raw Materials (wt.%) |    |     |     | Comprehensive Strength (MPa) |      |      |
|----------------|------------------------------------|----|-----|-----|------------------------------|------|------|
|                | SS                                 | DA | PAS | BFS | 3d                           | 7d   | 28d  |
| paste 1        | 28                                 | 8  | 20  | 44  | 14.6                         | 24.5 | 32.5 |
| paste 2        | 28                                 | 10 | 26  | 36  | 13.39                        | 24.4 | 33.7 |
| paste 3        | 28                                 | 12 | 32  | 28  | 12.46                        | 20   | 28.4 |
| paste 4        | 28                                 | 14 | 38  | 20  | 11.23                        | 15.8 | 24.0 |
| paste 5        | 32                                 | 8  | 26  | 34  | 14.45                        | 25.8 | 30.4 |
| paste 6        | 32                                 | 12 | 20  | 36  | 13.46                        | 24.9 | 35.2 |
| paste 7        | 32                                 | 14 | 36  | 18  | 11.46                        | 18.7 | 26.5 |
| paste 8        | 32                                 | 16 | 30  | 22  | 11.9                         | 20.6 | 28.4 |
| paste 9        | 36                                 | 8  | 32  | 24  | 12.48                        | 21.2 | 25.8 |
| paste 10       | 36                                 | 10 | 38  | 16  | 11.0                         | 17.6 | 22.7 |
| paste 11       | 36                                 | 12 | 20  | 32  | 11.33                        | 26.1 | 31.8 |
| paste 12       | 36                                 | 14 | 26  | 24  | 10.16                        | 21.2 | 29.6 |
| paste 13       | 40                                 | 8  | 38  | 14  | 10.51                        | 16.1 | 23.0 |
| paste 14       | 40                                 | 10 | 32  | 18  | 10.8                         | 18.1 | 25.9 |
| paste 15       | 40                                 | 12 | 26  | 22  | 10.31                        | 20.8 | 31.4 |
| paste 16       | 40                                 | 14 | 20  | 26  | 10.05                        | 22.9 | 32.3 |

**Table S2.** Main chemical compositions of four kinds of MSWI fly ashes.

| Components (%) | Fe <sub>2</sub> O <sub>3</sub> | Al <sub>2</sub> O <sub>3</sub> | SiO <sub>2</sub> | CaO   | MgO  | K <sub>2</sub> O | Na <sub>2</sub> O | Cl    | SO <sub>3</sub> |
|----------------|--------------------------------|--------------------------------|------------------|-------|------|------------------|-------------------|-------|-----------------|
| FA1            | 1.09                           | 0.30                           | 1.97             | 39.26 | 0.53 | 10.93            | 8.02              | 28.53 | 7.51            |
| FA2            | 0.62                           | 0.66                           | 2.21             | 49.13 | 1.57 | 6.41             | 9.27              | 21.95 | 6.82            |
| FA3            | 2.82                           | 0.92                           | 2.69             | 41.33 | 2.03 | 5.74             | 2.69              | 24.92 | 13.13           |
| FA4            | 5.79                           | 12.46                          | 24.86            | 26.99 | 4.04 | 3.38             | 5.01              | 6.43  | 6.05            |

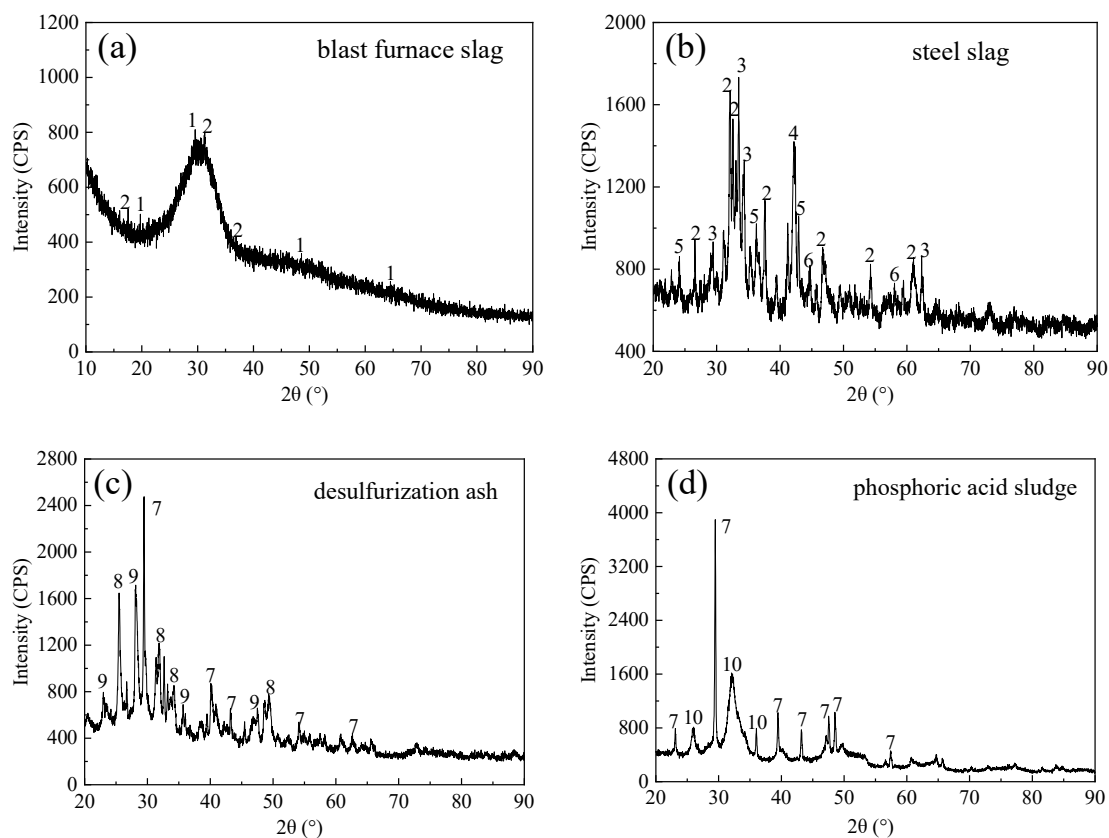

**Figure S1.** XRD patterns of blast furnace slag (a), steel slag (b), desulfurization ash (c) and phosphoric acid sludge (d). (1-Akermanite ( $\text{Ca}_2\text{MgSi}_2\text{O}_7$ ); 2-Dicalcium silicate ( $2\text{CaO}\cdot\text{SiO}_2$ ); 3-Tricalcium silicate ( $3\text{CaO}\cdot\text{SiO}_2$ ); 4-RO phases; 5-Iron oxide ( $\text{Fe}_2\text{O}_3$ ); 6-Tetra calcium aluminoferrite ( $4\text{CaO}\cdot\text{Al}_2\text{O}_3\cdot\text{Fe}_2\text{O}_3$ ); 7- Calcite ( $\text{CaCO}_3$ ); 8-Anhydrite ( $\text{CaSO}_4$ ); 9- Calcium sulfite ( $\text{CaSO}_3$ ); 10- Calcium sodium phosphate ( $\text{CaNaPO}_4$ )).
